# Supplementary material for: Two RNAs or DNAs May Artificially Fuse Together at a Short Homologous Sequence (SHS) during Reverse Transcription or Polymerase Chain Reactions, and Thus Reporting an SHS-Containing Chimeric RNA Requires Extra Caution
Source: PubMed Central journal article supplement (PMC4858267; doi:10.1371/journal.pone.0154855), 2016-05-05
Supplement: pone.0154855.s001.pdf [file pone.0154855.s001.pdf]

**Our mt-chimeric RNA sequences:**

1) Primers: mtF3168/mtR2694, from Hella cells

CCGTAAATGATATCATCTCAACTTAGCATTATACCCACACCCACCCAAGAACA**GGGTTTGTTAG**GGTTCTGTTTGCAT  
TAATAAATTAAGCTCCATAGGGTCTTCTCGTCTTGCTGAGTCATGCCCGCCTCTTCACGGGCAGGTCAATT

2) Primers: mtF3168/mtF2581, from Hella cells

ACCGTGCAAAGGTAGCATAATCACTTGTTTCCTTAAATAGGGACCTGTATGAATGGCTCCACGAGGGTTCAGCTGTCT  
CTTACTTTTAACCAAGTCAAATTGACCTGCCCCTGAAGAGGCGGGCATGACACAGCAAGACGAGAAGACCCTATGGAG  
CTTTAATTTATTAATGCAAACAGAACCTAAC**AAACCCTGTT**CCTGGGTGGGTGTGGGTATAATGCTAAGTTGAGATG  
ATATCATTTACGG

3) Primers: mtF2847/mtR2694, from Hella cells

GTACATGCTAAGACTTCACCAGTCAAAGCGAACTACTATACTCAATTGATCCAATAACTTGACCAACGGAACAAGTT  
ACCCTAGGGATAACAGCGCAATCCTATTCTAGAGTCCATATCAACAATAGGGTTTACGACCTCGATGTTGGATCAGG  
ACATCCCGATGGTGCAGCCGCTATTAAAGGTTTCGTTTGTTC AACGATTAAGTCCTACGTGATCTGAGTTCAGACCG  
GAGTAATCCAGGTTCGGTTTCTATCTACTTCAAATTCCTCCCTGTACGAAAGGACAAGAGAAATAAGGCCTACTTCCAC  
AAAGCGCCTTCCCCCGTAAATGATATCATCTCAACTTAGCATTATACCCACACCCACCCAAGAACA**GGGTTTGTTAG**GTACTGTTTGCATTAATAAATTAAGCTCCATAGGGTCTTCTCGTCTTGCTGTGTGCATGCCCGCCTCTTCACGGGCA  
GGTCAATT

4) Primers: mtF2581/mtF2847, from Hela cells

GTACATGCTAAGACTTCACCAGTCAAAGCGAACTACTATACTCAATTGATCCAATAACTTGACCAACGGAACAAGTT  
ACCCTAGGGATAACAGCGCAATCCTATTCTAGAGTCCATATCAACAATAGGGTTTACGACCTCGATGTTGGATCAGG  
ACATCCCGATGGTGCAGCCGCTATTAAAGGTTTCGTTTGTTC AACGATTAAGTCCTACGTGATCTGAGTTCAGACCG  
GAGTAATCCAGGTTCGGTTTCTATCTACTTCAAATTCCTCCCTGTACGAAAGGACAAGAGAAATAAGGCCTACTTCCAC  
AAAGCGCCTTCCCCCGTAAATGATATCATCTCAACTTAGCATTATACCCACACCCACCCAAGAACA**GGGTTTGTTAG**GTACTGTTTGCATTAATAAATTAAGCTCCATAGGGTCTTCTCGTCTTGCTGTGTGCATGCCCGCCTCTTCACGGGCA  
GGTCAATTTCACTGGTTAAAAGTAAGAGACAGCTGAACCCTCGTGGAGCCATTATACAGGTCCCTATTTAAGGAAC  
AAGTGATTATGCTACCTTTGCACGGT

5) Primers: mtF2581/mtF2847 from Hela cells

GTACATGCTAAGACTTCACCGGTCAAAGCGAACTACTATACTCAATTGATCCAATAACTTGACCAACGGAACAAGTT  
ACCCTAGGGATAACAGCGCAATCCTATTCTAGAGTCCATATCAACAATAGGGTTTACGACCTCGATGTTGGATCAGG  
ACATCCCGATGGTGCAGCCGCTATTAAAGGTTTCGTTTGTTC AACGATTAAGTCCTACGTGATCTGAGTTCAGACCG  
GAGTAATCCAGGTTCGGTTTCTATCTACTTCAAATTC**TCCT**TAATTAAGGAACAAGTGATTATGCTACCTTTGCACG  
GT

6) Primers: mtF2581/mtF2847 from Hela cells

GTACATGCTAAGACTTCACCAGTCAAAGCGAACTACTATACTCAATTGATCCAATAACTTGACCAAC**GGAACAAGTG**ATTATGCTACCTTTGCACGGT

Legend: Sequences of the six 16S rRNA containing chimeric cDNAs cloned from Hela cells using the indicated pair of primers (underlined) that locate at the beginning and the end of the sequence. The yellow-shaded region is the SHS.
